# Supplementary material
Source: publisher figshare collection journal article supplement (https://tandf.figshare.com/ndownloader/files/21784950)
Supplement: Supplementary file 1 [file 21784950]

**Unnatural Partners: Coalescence in Israeli Local Government**

Online Appendix

**Table A1: Municipality and council descriptive data**

|  | **2008** | | | | **2013** | | | |
| --- | --- | --- | --- | --- | --- | --- | --- | --- |
| City | Population | Seats | Lists  (coalition/council) | Coalition size | Population | Seats | Lists  (coalition/council) | Coalition size |
| Ashdod | 204,403 | 27 | 9 / 11 | 0.85 | 216,511 | 27 | 9 / 10 | 0.85 |
| Ashkelon | 110,593 | 21 | 10 / 13 | 0.81 | 123,478 | 23 | 11 / 12 | 0.91 |
| Bat Yam | 130,351 | 25 | 5 / 9 | 0.68 | 128,871 | 25 | 5 / 8 | 0.76 |
| Beer Sheva | 193,580 | 27 | 3 / 11 | 0.52 | 199,334 | 27 | 7 / 7 | 1.00 |
| Hadera | 79,444 | 19 | 7 / 10 | 0.74 | 85,397 | 19 | 5 / 9 | 0.63 |
| Haifa | 264,407 | 31 | 9 / 15 | 0.61 | 273,177 | 31 | 6 / 16 | 0.55 |
| Herzliya | 86,299 | 19 | 5 / 10 | 0.74 | 89,813 | 19 | 8 / 10 | 0.79 |
| Holon | 176,364 | 25 | 3 / 8 | 0.64 | 186,399 | 27 | 5 / 10 | 0.74 |
| Jerusalem | 760,420 | 31 | 9 / 10 | 0.97 | 829,863 | 31 | 9 / 11 | 0.90 |
| Kefar Sava | 82,858 | 19 | 4 / 8 | 0.58 | 91,664 | 19 | 5 / 8 | 0.74 |
| Modiin | 69,353 | 17 | 8 / 9 | 0.94 | 85,426 | 19 | 8 / 9 | 0.89 |
| Netanya | 180,184 | 27 | 3 / 10 | 0.56 | 196,978 | 27 | 3 / 10 | 0.52 |
| Petah Tikva | 200,371 | 25 | 9 / 13 | 0.68 | 219,303 | 27 | 8 / 12 | 0.70 |
| Ramat Gan | 143,622 | 25 | 7 / 11 | 0.64 | 149,594 | 25 | 11 / 13 | 0.76 |
| Rehovot | 111,092 | 21 | 7 / 11 | 0.76 | 124,988 | 23 | 9 / 9 | 1.00 |
| Rishon LeZion | 226,895 | 27 | 7 / 12 | 0.67 | 237,639 | 29 | 13 / 14 | 0.93 |
| Tel Aviv | 402,781 | 31 | 7 / 12 | 0.61 | 418,590 | 31 | 13 / 13 | 1.00 |

**Table A2: Descriptive statistics of independent variables – conditional logit analysis**

|  | (1) | (2) | (3) | (4) | (5) |
| --- | --- | --- | --- | --- | --- |
| VARIABLES | N | mean | sd | min | max |
| Cross-bloc: economy | 92,991 | 0.742 | 0.438 | 0 | 1 |
| Cross-bloc: security | 92,991 | 0.608 | 0.488 | 0 | 1 |
| Cross-bloc: religion | 92,991 | 0.815 | 0.388 | 0 | 1 |
| Minimal-winning coalition | 92,991 | 0.0956 | 0.294 | 0 | 1 |
| Oversized | 92,991 | 0.611 | 0.487 | 0 | 1 |
| Mayor size | 92,991 | 0.151 | 0.0566 | 0.0476 | 0.519 |
| % nationally affiliated | 92,991 | 0.477 | 0.186 | 0 | 1 |
| % in national coalition | 92,991 | 0.237 | 0.146 | 0 | 1 |
| Incl. interior dept. party | 92,991 | 0.195 | 0.396 | 0 | 1 |
| Incl. losing candidates | 92,991 | 0.839 | 0.368 | 0 | 1 |
| Incl. first losing candidate | 92,991 | 0.520 | 0.500 | 0 | 1 |

**Table A3: Descriptive statistics of national-level coalitions, 1984-2015a**

|  | Frequency | Share (percentage) |
| --- | --- | --- |
| Minimal winning | 5 | 31.2 |
| Minority cabinet | 1 | 6.2 |
| Oversized coalition | 10 | 62.5 |
| Including largest party | 13 | 81.2 |
| Including median partyb | 15 | 93.8 |
| Including parties from both blocsb | 7 | 43.8 |
| Total | 16 | 100 |

a Including all official cabinets on the occasion of their investiture according to the Knesset’s website

b Using the most dominant, dovish-hawkish dimension.

**Table A4: Interviewee details - mayors**

| **City** | **Mode of interview** |
| --- | --- |
| Tel Aviv | Face-to-face |
| Hadera | Face-to-face |
| Ashkelon | E-mail |
| Beer Sheva | E-mail |
| Modi’in | E-mail |

**Table A5: Interviewee details- council members**

| **City** | **Coalition Affiliation*** | **Type of List** | **Mode of interview** |
| --- | --- | --- | --- |
| Jerusalem | Opposition | Nationally-affiliated | Phone |
| Opposition | Nationally-affiliated | Face-to-face |
| Tel Aviv | Coalition | Nationally-affiliated | Phone |
| Coalition | Local | Face-to-face |
| Coalition | Local | Phone |
| Haifa | Opposition | Local | Phone |
| Opposition | Local | Phone |
| Coalition | Local | Phone |

* At the time of interview

**Figure A1: Marginal effect of oversized coalition status on the likelihood of a coalition forming**


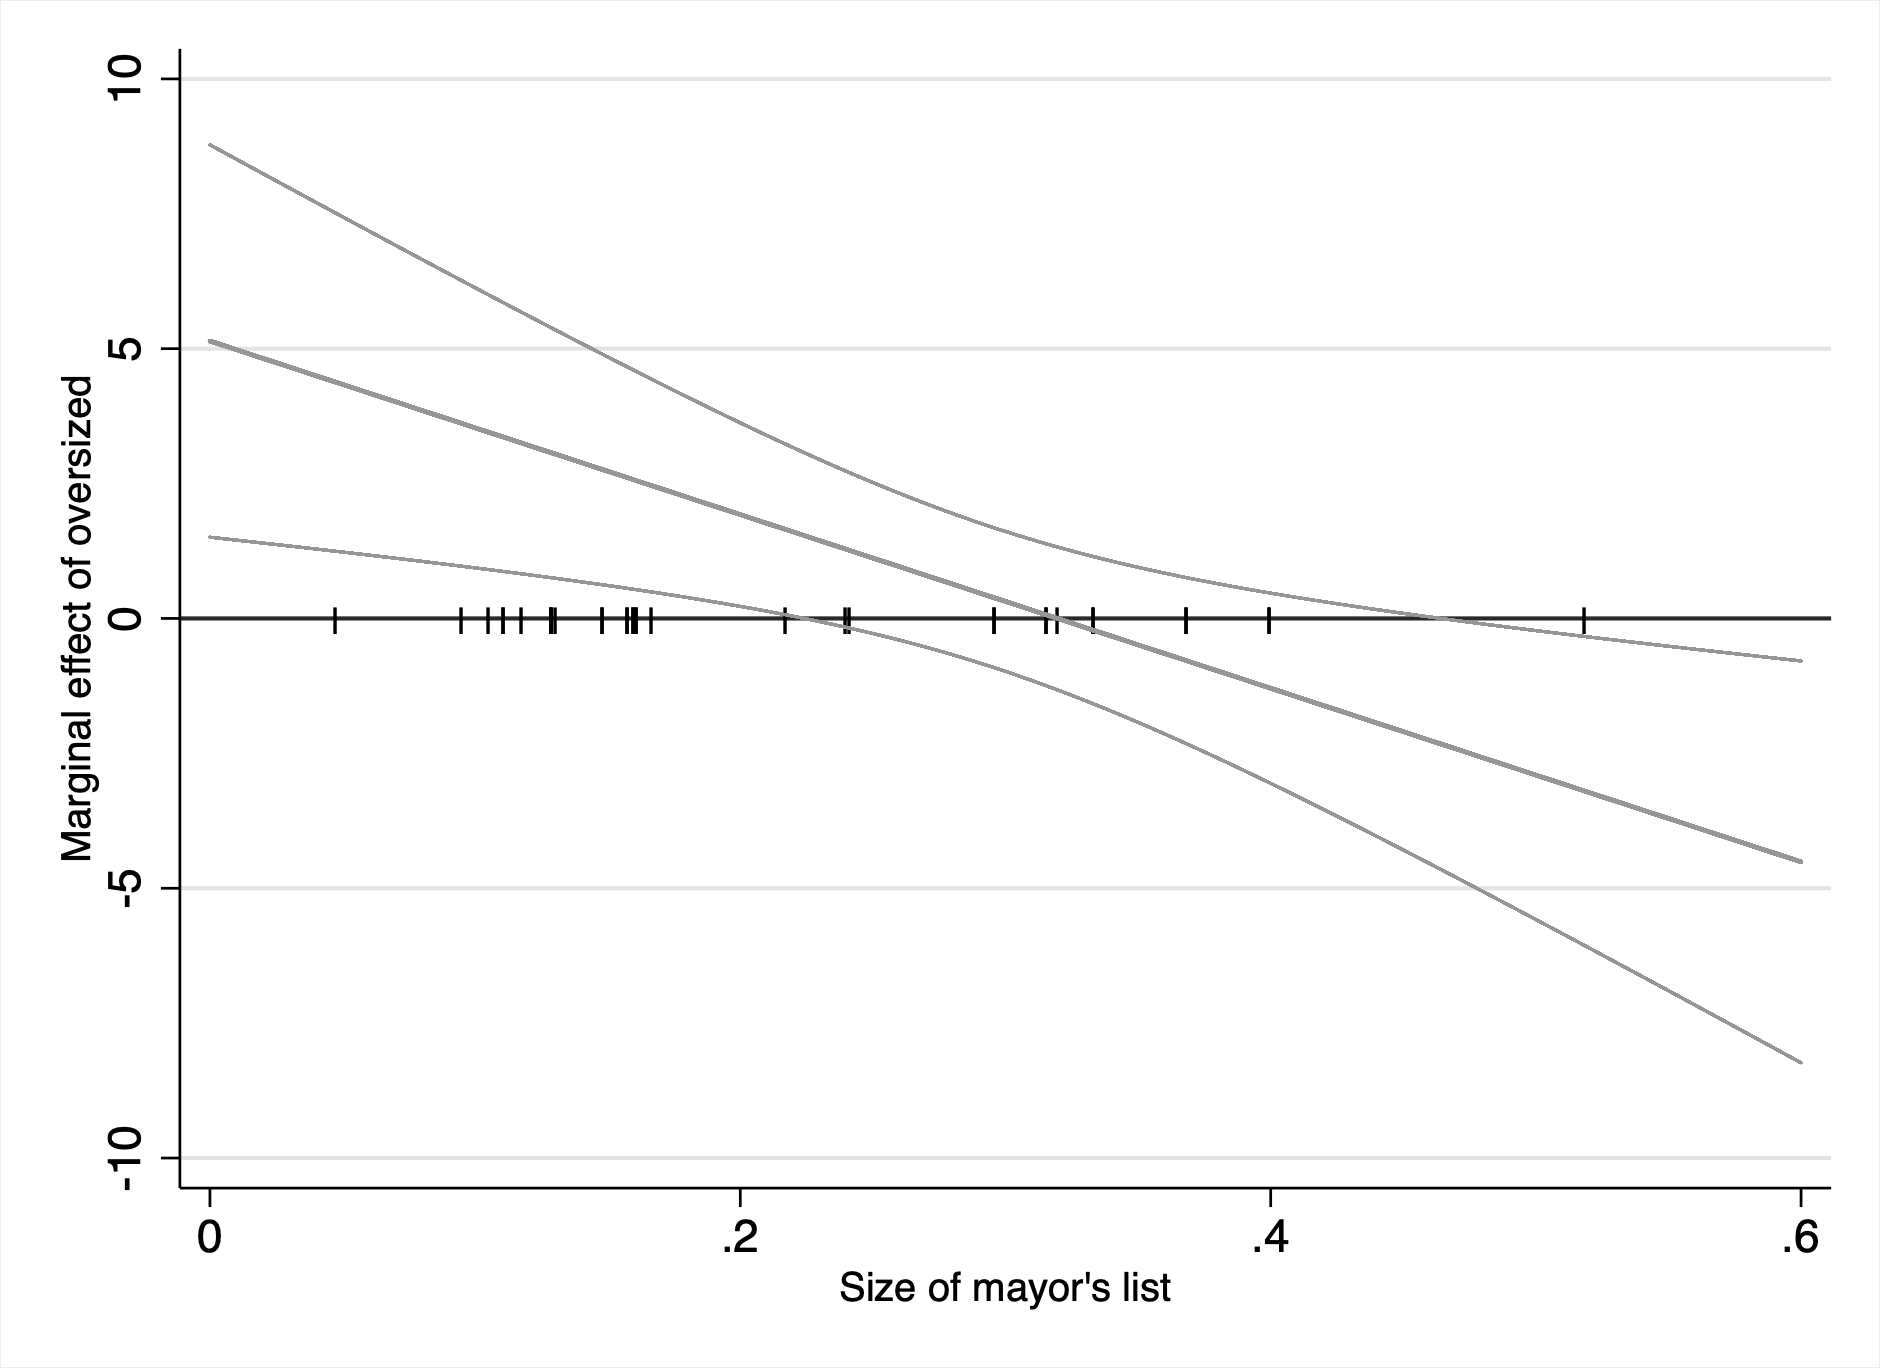
*Note*: graphic analysis based on Model 2b in Table 1.
